# Supplementary material
Source: ML conference proceedings conference paper supplement (https://openreview.net/forum?id=qDeEsfAb1j)

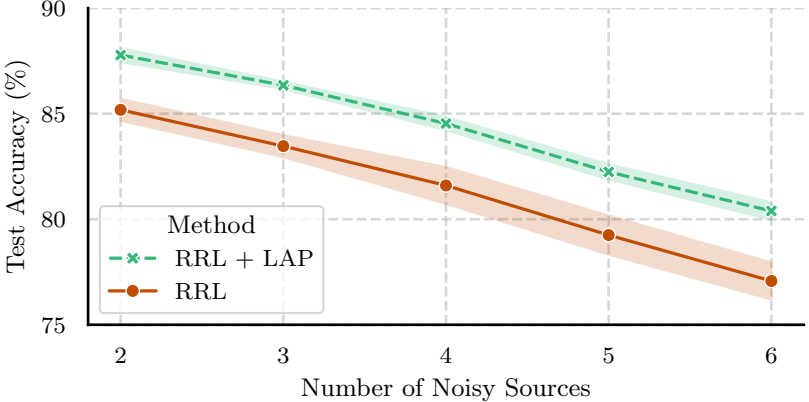

Supplement: supplementary_material [file attachment]

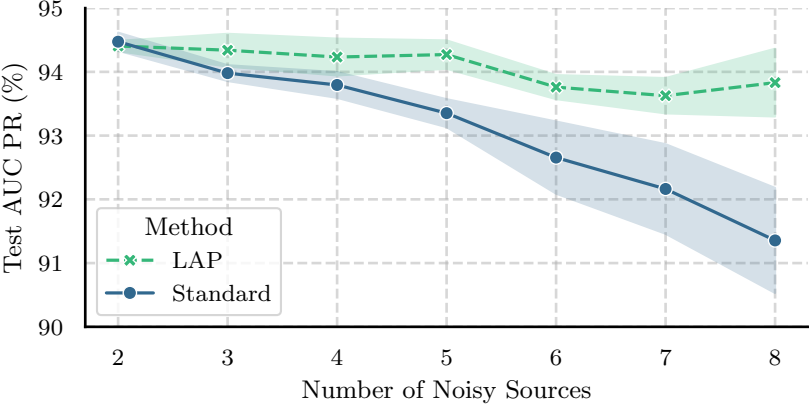

Supplement: supplementary_material [file attachment]

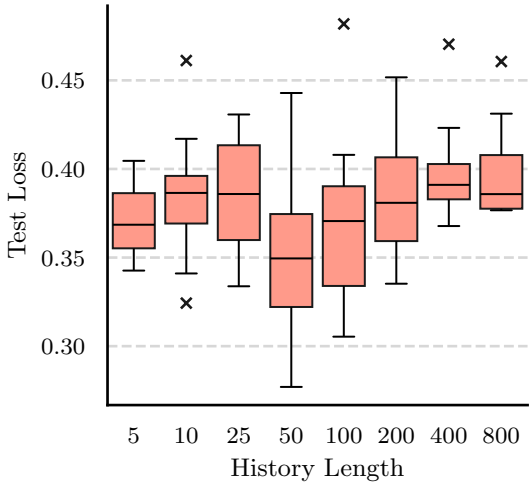

Supplement: supplementary_material [file attachment]

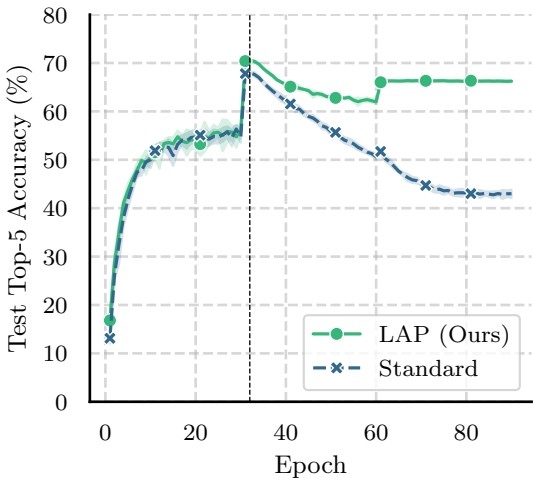

Supplement: supplementary_material [file attachment]

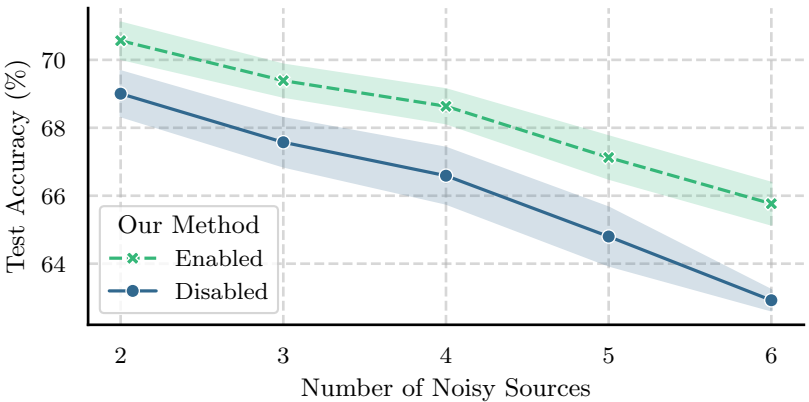

Supplement: supplementary_material [file attachment]

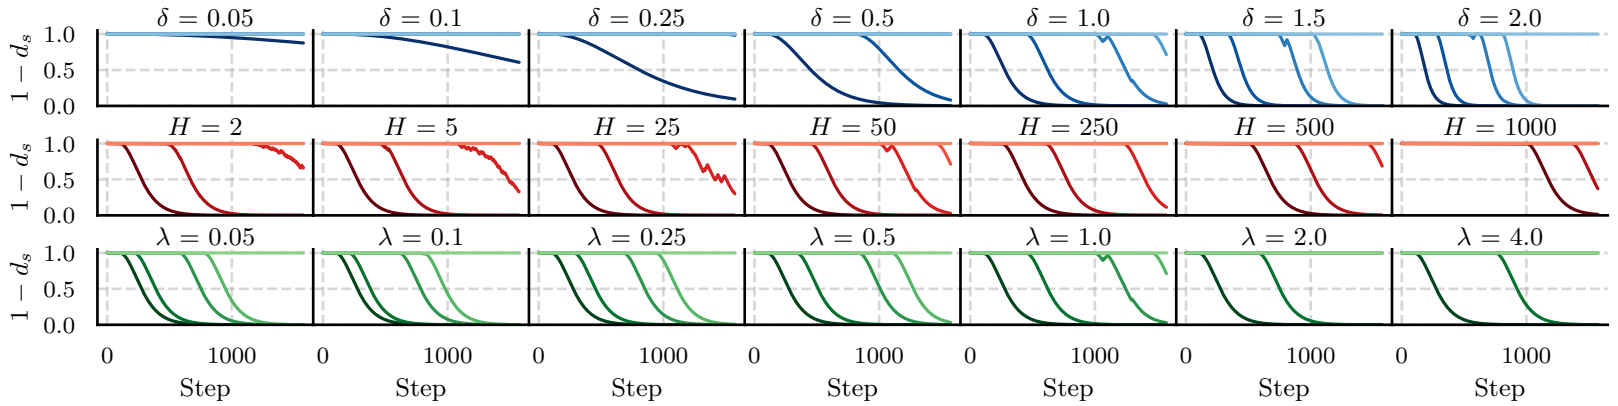

Supplement: supplementary_material [file attachment]

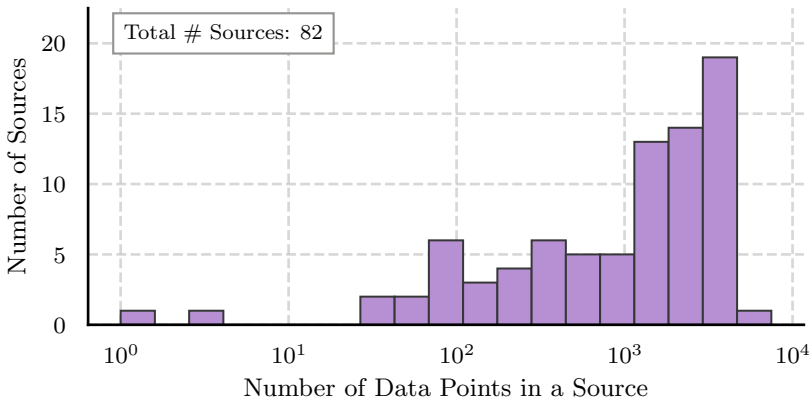

Supplement: supplementary_material [file attachment]

Number of Sources

Total # Sources: 82  
Total # Classes: 28

40  
30  
20  
10  
0

0

5

10

15

20

25

Number of Unique Classes in a Source

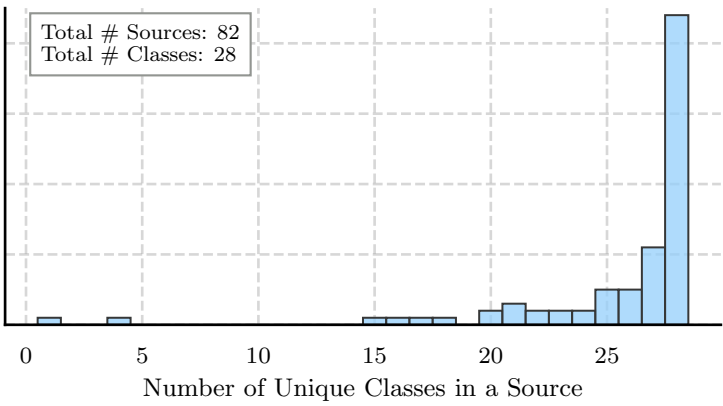

Supplement: supplementary_material [file attachment]

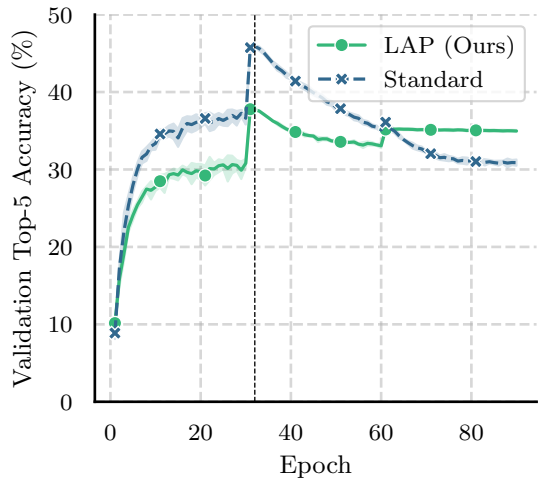

Supplement: supplementary_material [file attachment]

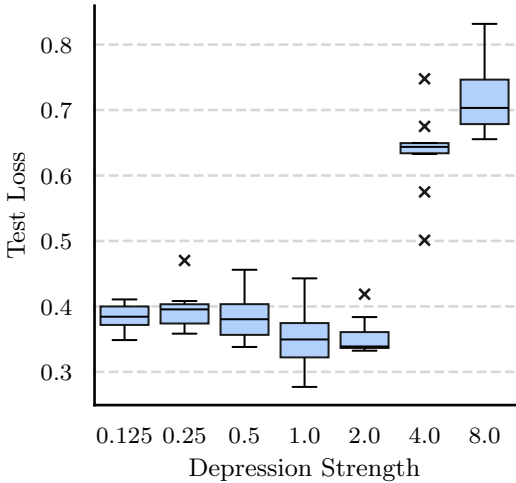

Supplement: supplementary_material [file attachment]

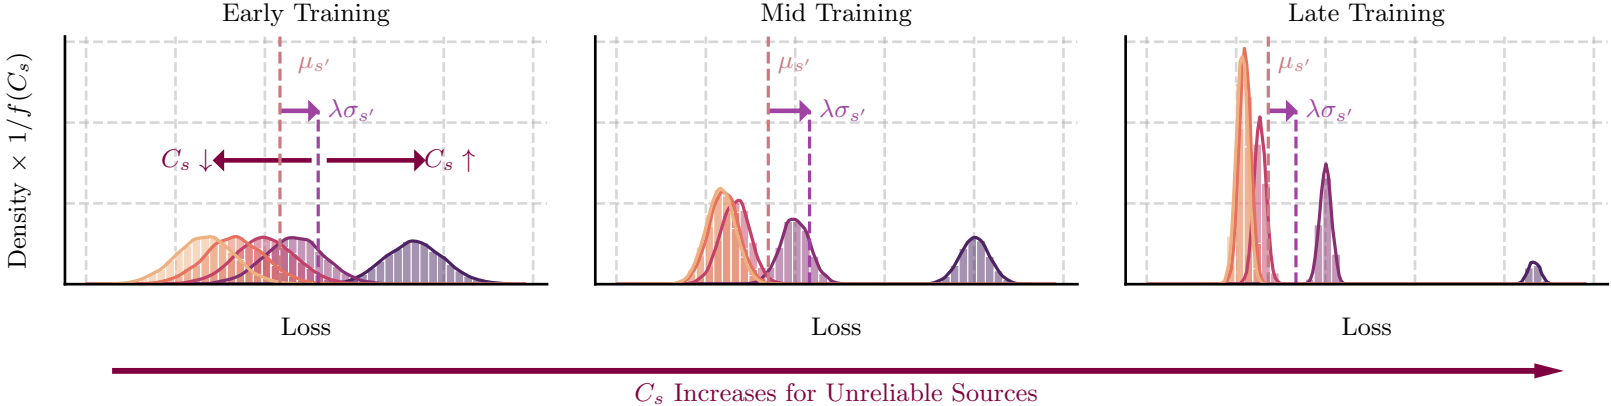

Supplement: supplementary_material [file attachment]

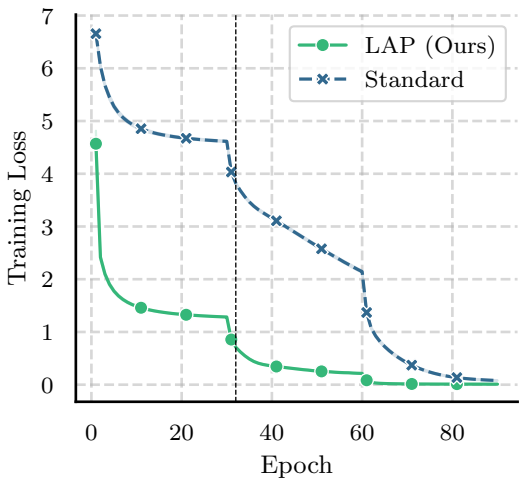

Supplement: supplementary_material [file attachment]

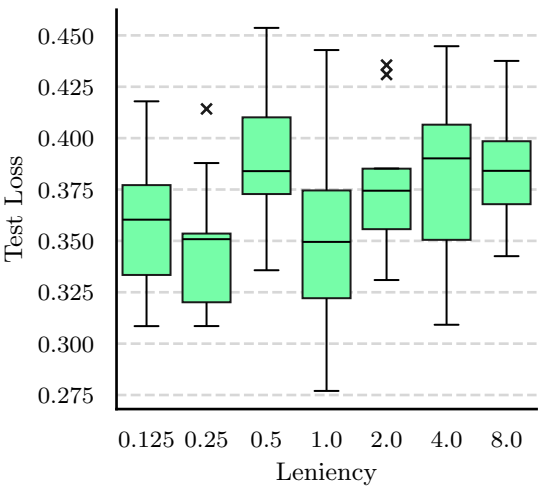

Supplement: supplementary_material [file attachment]
